# Supplementary material
Source: publisher figshare collection journal article supplement (https://acs.figshare.com/ndownloader/files/3718225)
Supplement: Supplementary file 1 [file 3718225]

**Electron acceptors based on alpha-substituted PDI for organic solar cells**

Donglin Zhao#, Qinghe Wu#, Zhengxu Cai, Tianyue Zheng, Wei Chen, Jessica Lu and Luping Yu\*

Department of Chemistry and The James Franck Institute, The University of Chicago, 929 E 57<sup>th</sup> Street, Chicago, IL 60637

## 1. The synthesis and characterization

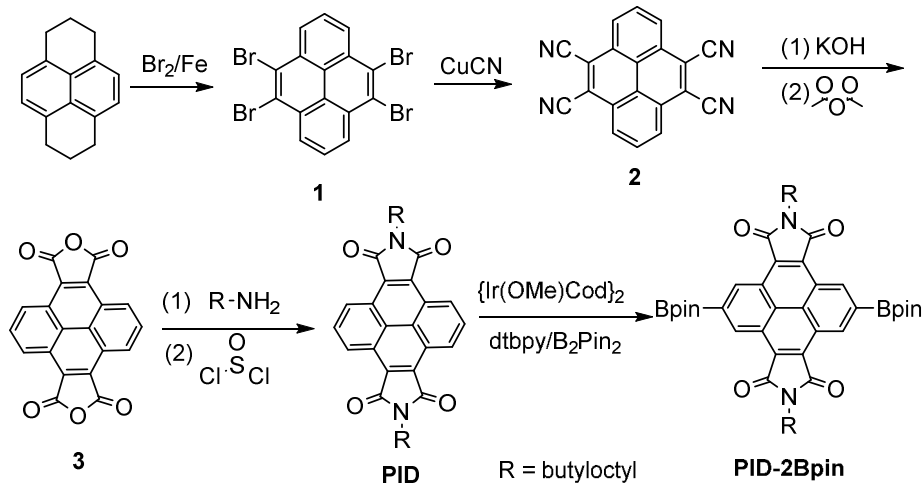

Scheme 1. The synthesis of PID-2Bpin.

Compound **4**, **5**, **7**, **8** and 1,2,3,6,7,8-hexahydropyrene was synthesized according to the literature.<sup>1-3</sup>

### Compound **1**

1,2,3,6,7,8-hexahydropyrene (3.12 g), Bromine (27.17 g), iron powder (0.59 g) and 100 ml dichloromethane were added to a 250 mL round bottom flask and refluxed overnight. The precipitate was filtered and washed with acetone (3×200 ml) and boiling chloroform (3×200 ml). 6.52g 4,5,9,10-tetrabromopyrene was obtained in the yield of 84%. MS (MALDI-TOF) m/z :  $\text{C}_{16}\text{H}_6\text{Br}_4$  m/z: 517.84; Found: 518.15 ( $\text{M}+\text{H}$ )<sup>+</sup>

### Compound **2** and **3**

4,5,9,10-tetrabromopyrene (6.20 g), CuCN (8.60 g) and anhydrous NMP were added to a 250 mL round bottom flask under nitrogen atmosphere and reacted at 200 °C for 2 hours. After cooling down, the solution was poured into saturated ammonium. The precipitate was filtered and washed with ammonium, acetone and boiling chloroform. Without further purification, the insoluble solid was added to the KOH (13.5 g) solution in HOCH<sub>2</sub>CH<sub>2</sub>OH (60 mL) and water (15 mL) and heated to 160 for 48 hours. After cooling down to 0, concentrated hydrochloric acid were added dropwise to pH = 1. The precipitate was filtered and washed with water and acetone. The obtained crude product was refluxed in acetic anhydride (60 ml) overnight. 0.65 g yellow product was obtained by filtration. The yield for three-step reactions is 15.8 %. The solubility of compound **2**, **3** are very low in common solvent such as chloroform, chlorobenzene, DMF, DMSO.

### Compound PID

0.34 g compound **3** and 0.56 g 2-butyloctylamine in 20 ml anhydrous toluene was heated to reflux for 5 hours. After removing the solvent under reduced pressure, the reaction mixture was added thionyl chloride (5 ml) and refluxed for 2 hours. The thionyl chloride was removed under reduced pressure. The crude product was purified by column chromatography, using dichloromethane as the eluent. 0.51 g compound **3** was obtained (yield: 76%).  $^1\text{H}$  NMR (400 MHz,  $\text{CDCl}_3$ )  $\delta$  (ppm): 9.49 (d,  $J = 80$  Hz, 4H), 8.28 (T,  $J = 80$  Hz, 2H), 3.74 (d,  $J = 72$  Hz, 4H), 2.0 (m, 2H), 1.35 (br, 32H), 0.90 (br, 12H).  $^{13}\text{C}$  NMR (500 MHz,  $\text{CDCl}_3$ )  $\delta$  14.096, 14.127, 22.663, 23.072, 26.391, 28.607, 29.707, 31.276, 31.618, 31.861, 37.328, 42.367, 124.484, 126.721, 128.244, 128.715, 128.810, 169.792. MS (MALDI-TOF)  $\text{C}_{44}\text{H}_{56}\text{N}_2\text{O}_4$   $m/z$ : 676.42; Found: 677.13 ( $\text{M} + \text{H}$ ) $^+$

### Compound PID-2Bpin

$\{\text{Ir}(\text{OMe})\text{Cod}\}$  (33 mg), 4,4'-di-tert-butyl-2,2'-dipyridyl (66 mg) and  $(\text{BPin})_2$  (64 mg) were mixed in 20 ml anhydrous hexane under  $\text{N}_2$  atmosphere. Then the mixture was transferred to a sealed tube which contains compound **3** (0.338 g) and  $(\text{BPin})_2$  (0.254 g). After reacting at  $120^\circ\text{C}$  for 24 hours, the solvent was removed under reduced pressure. 0.288 g of pure compound **4** (62 %) was obtained by column chromatography, using dichloromethane as the eluent.  $^1\text{H}$  NMR (400 MHz,  $\text{CDCl}_3$ )  $\delta$  (ppm): 9.86 (s, 4H), 3.76 (d,  $J = 72$  Hz, 4H), 2.0 (m, 2H), 1.50 (s, 24H), 1.35 (br, 32H), 0.88 (br, 12H).  $^{13}\text{C}$  NMR (500 MHz,  $\text{CDCl}_3$ )  $\delta$  14.102, 14.179, 22.660, 23.122, 25.133, 26.605, 28.872, 29.776, 31.420, 31.756, 31.918, 37.388, 42.662, 84.636, 123.678, 128.034, 129.296, 132.428, 169.447. MS (MALDI-TOF)  $\text{C}_{56}\text{H}_{78}\text{B}_2\text{N}_2\text{O}_8$   $m/z$ : 928.59; Found: 929.97 ( $\text{M} + \text{H}$ ) $^+$ .

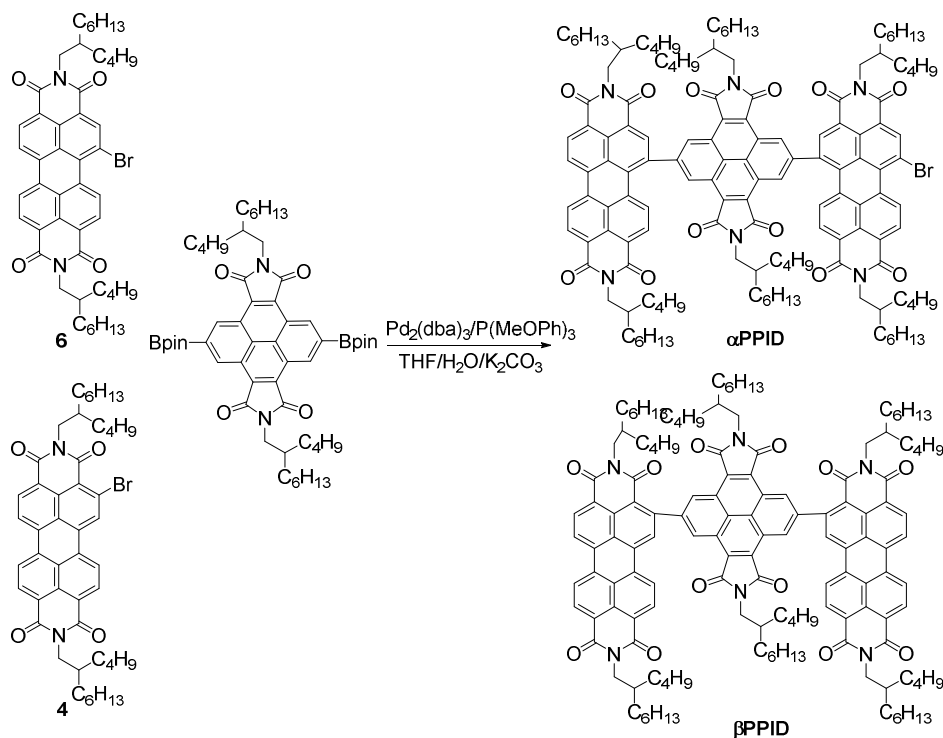

Scheme 2. The synthesis of  $\beta$ PPID and  $\alpha$ PPID.

### Compound $\beta$ PPID

$\text{Pd}_2(\text{dba})_3$  (9 mg) and  $\text{P}(\text{MeOPh})_3$  was added to the mixture of compound **4** (104 mg), compound **3** (60 mg), THF (8 mL) and 2M  $\text{K}_2\text{CO}_3$  aqueous solution (2 mL) under nitrogen. After refluxing overnight, the mixture was poured into methanol. The red precipitate was filtered and purified by column chromatography, using chloroform as the eluent. 96 mg of pure  $\beta$ PPID (70%) was obtained.  $^1\text{H}$  NMR (400 MHz,  $\text{CDCl}_3$ )  $\delta$  (ppm): 9.79 (s, 4H), 8.78 (br, 10H), 7.90 (d,  $J = 84$  Hz 2H), 7.63 (d,  $J = 84$  Hz 2H), 4.1 (br, 8H), 3.59 (br, 4H) 2.1 (br, 6H), 1.26 (br, 96H), 0.90 (br, 36H). MS (MALDI-TOF)  $\text{C}_{140}\text{H}_{168}\text{N}_6\text{O}_{12}$   $m/z$ : 2125.27; Found: 2125.68 ( $\text{M}^+$ ). Anal. Calcd for  $\text{C}_{140}\text{H}_{168}\text{N}_6\text{O}_{12}$ : C, 79.06; H, 7.96; N, 3.95. Found: C, 79.12; H, 8.06; N, 4.04.

### Compound $\alpha$ PPID

$\alpha$ PPID was synthesized according to the same procedure as  $\beta$ PPID in the yield of 76%. (Due to the self-assembly of  $\alpha$ PPID, the multiple and broad peaks was observed in  $^1\text{H}$  NMR )  $^1\text{H}$  NMR (400 MHz,  $\text{CDCl}_3$ )  $\delta$  (ppm): 9.37-9.72 (br, 4H), 8.98-7.73 (br, 14H), 4.36-3.71 (br, 12H), 2.20-1.98 (br, 6H), 1.33 (br, 96H), 0.90 (br, 36H). MS (MALDI-TOF)  $\text{C}_{140}\text{H}_{168}\text{N}_6\text{O}_{12}$   $m/z$ : 2125.27; Found: 2125.82 ( $\text{M}^+$ ) Anal. Calcd for  $\text{C}_{140}\text{H}_{168}\text{N}_6\text{O}_{12}$ : C, 79.06; H, 7.96; N, 3.95. Found: C, 79.49; H, 8.14; N, 4.05.

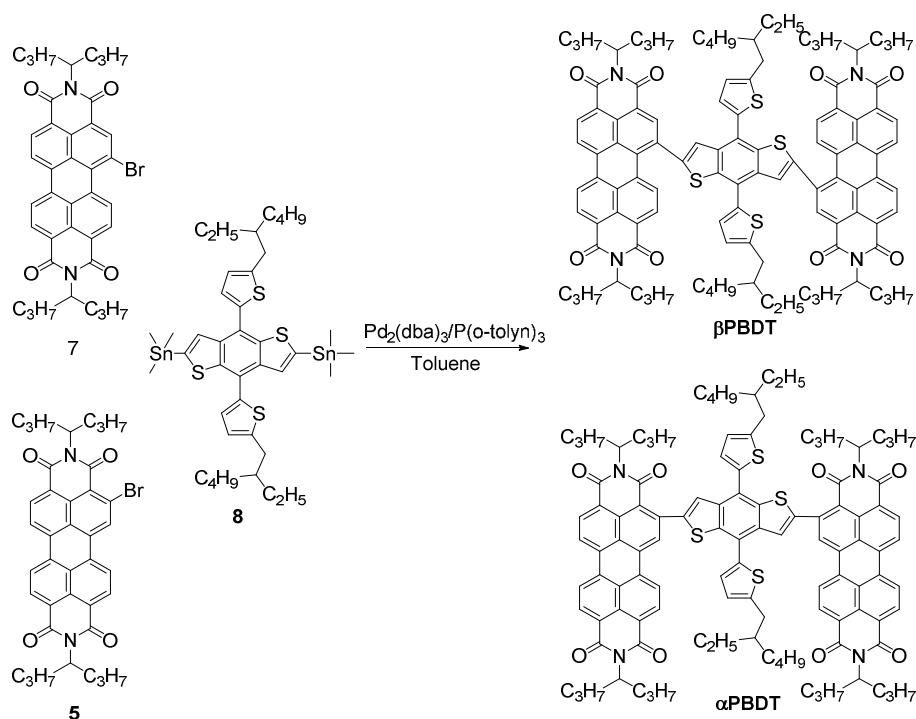

### Scheme 3. The synthesis of $\beta$ PBDT and $\alpha$ PBDT.

#### Compound $\beta$ PBDT

$\text{Pd}_2(\text{dba})_3$  (9 mg) and  $\text{P}(\text{o-tolyn})_3$  (24 mg) was added to the mixture of compound **4** (133 mg), compound **6** (90.5 mg) and dry toluene (6 mL) under nitrogen. After refluxing overnight, the mixture was poured into methanol. The dark red precipitate was filtered and purified by column chromatography, using chloroform as the eluent. 120 mg of pure  $\beta$ -PPBDT (69%) was obtained.  $^1\text{H}$  NMR (400 MHz,  $\text{CDCl}_3$ )  $\delta$  (ppm): 8.70-8.35 (br, 14H), 7.95 (s, 2H), 7.34 (d, 2H), 6.80 (d, 2H), 5.25 (br, 4H), 2.74 (br, 4H), 2.26 (br, 8H), 1.82 (br, 8H), 1.56 (br, 2H), 1.32 (br, 32H), 0.96-0.81 (br, 36H).  $^{13}\text{C}$  NMR (500 MHz,  $\text{CDCl}_3$ )  $\delta$  (ppm): 164.49 (br), 146.39, 146.17, 140.27, 137.70, 136.25, 134.98, 134.09, 133.82, 133.77, 133.50, 131.44-130.89 (br), 130.19, 129.17, 129.09, 129.04, 128.29, 128.23, 127.92, 127.37, 125.51, 125.24, 123.67, 123.32, 122.94, 54.30, 54.16, 41.24, 34.49, 34.18, 32.39, 29.72, 28.78, 25.61, 22.88, 20.15, 20.12, 14.13, 14.02. MS (MALDI-TOF)  $\text{C}_{110}\text{H}_{114}\text{N}_4\text{O}_8\text{S}_4$   $m/z$ : 1746.75; Found: 1746.60 ( $\text{M}^+$ ) Anal. Calcd for  $\text{C}_{110}\text{H}_{114}\text{N}_4\text{O}_8\text{S}_4$ : C, 75.57; H, 6.57; N, 3.20. Found: C, 75.48; H, 6.64; N, 3.20.

#### Compound $\alpha$ PBDT

$\alpha$ PBDT was synthesized according to the same procedure as  $\beta$ PBDT in the yield of 80%.  $^1\text{H}$  NMR (400 MHz,  $\text{CDCl}_3$ )  $\delta$  (ppm): 8.63-8.67 (br, 14H), 7.80 (s, 2H), 7.43 (d, 2H), 6.86 (d, 2H), 5.25-5.14 (br, 4H), 2.81 (d, 4H), 2.25 (br, 8H), 1.80 (br, 8H), 1.63 (br, 2), 1.33 (br, 32H), 0.90 (br, 36H).  $^{13}\text{C}$  NMR (500 MHz,  $\text{CDCl}_3$ )  $\delta$  (ppm): 164 (br), 145.86, 144.10, 140.14, 137.18, 137.04, 134.46, 134.30, 133.93, 133.22, 131-132 (br), 130.38, 129.55, 128.05, 127.91, 126.44, 126.29, 125.36, 124.36, 124 (br), 123.46, 123.12, 122.79, 54.24, 41.39, 34.54, 34.37, 34.24, 32.44, 28.85, 25.60, 22.97, 20.16, 14.09, 14.02, 14.01, 10.80. MS (MALDI-TOF)  $\text{C}_{110}\text{H}_{114}\text{N}_4\text{O}_8\text{S}_4$   $m/z$ : 1746.75; Found: 1746.58 ( $\text{M}^+$ ). Anal. Calcd for  $\text{C}_{110}\text{H}_{114}\text{N}_4\text{O}_8\text{S}_4$ : C, 75.57; H, 6.57; N, 3.20. Found: C, 75.86; H, 6.54; N, 3.34.

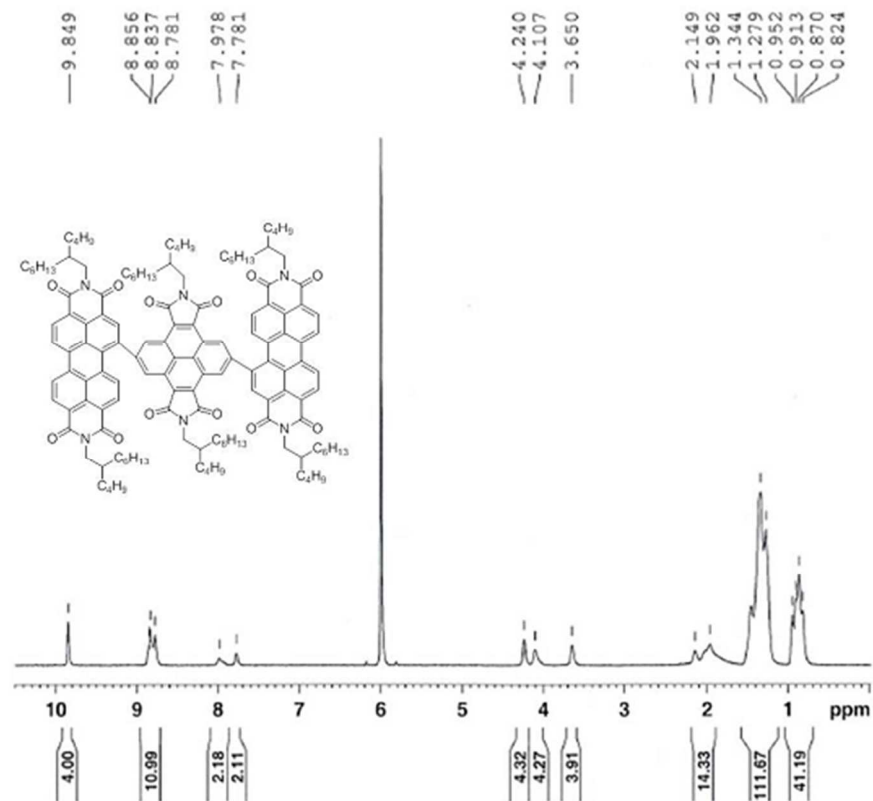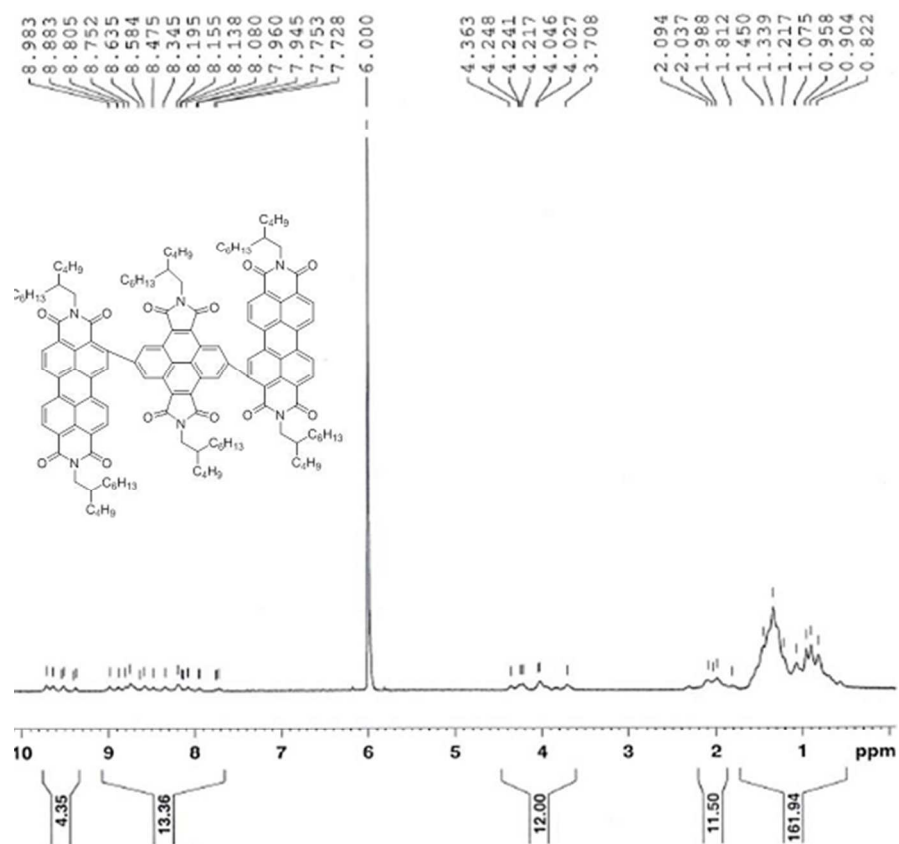

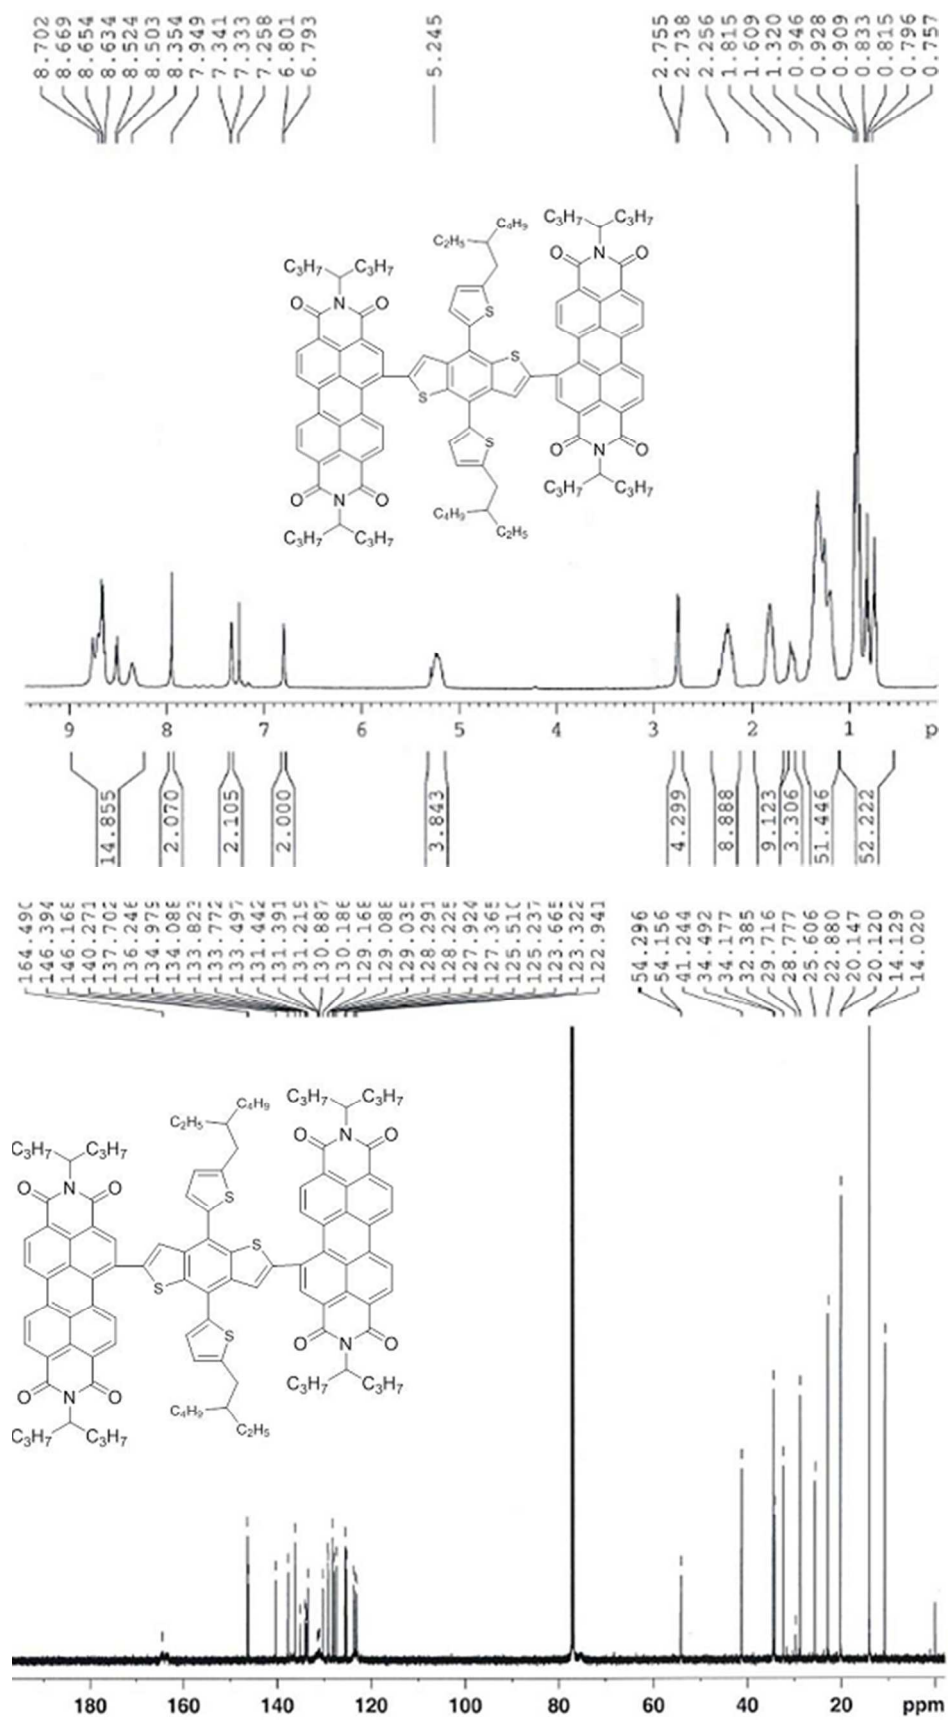

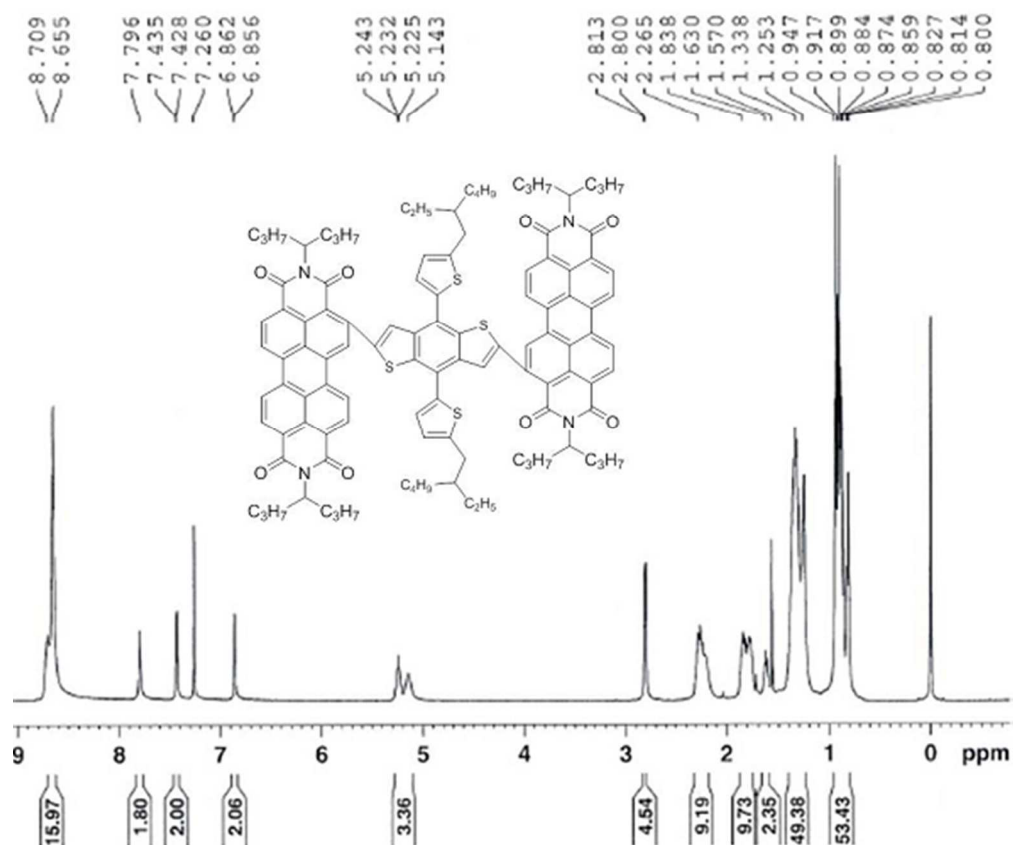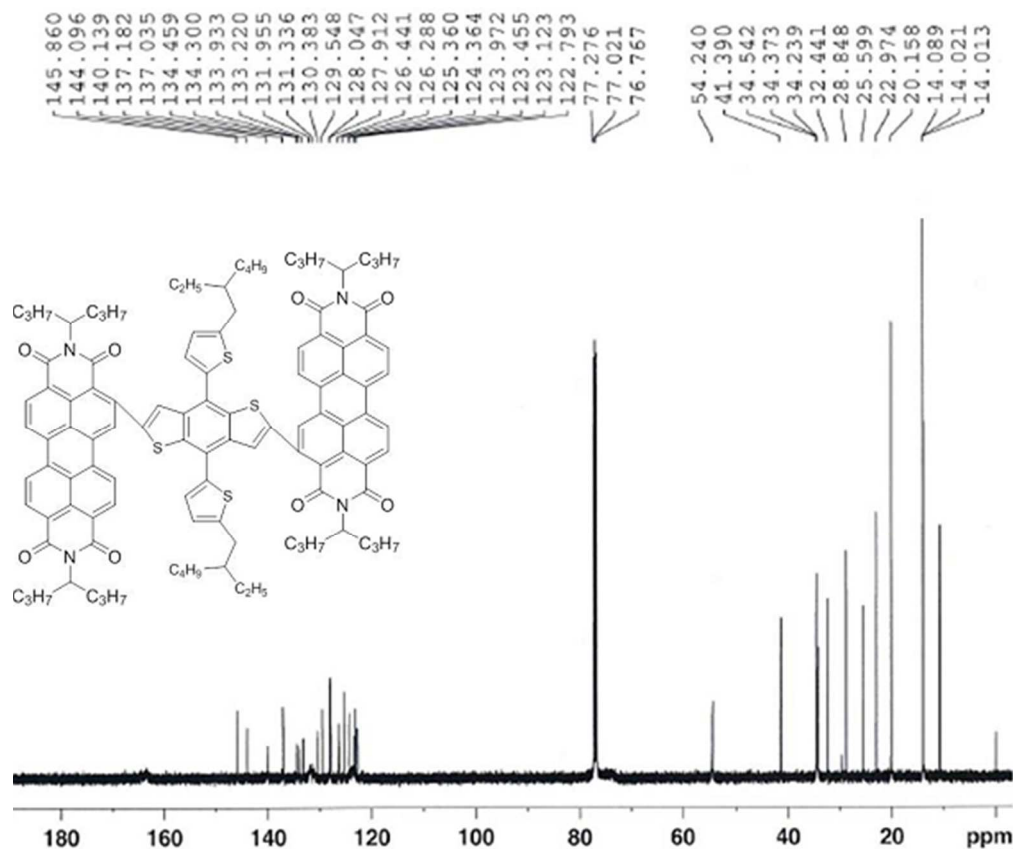



## 2. Device fabrication

Polymer PTB7-TH was obtained from 1-material.  $\text{ZnAc}_2 \cdot 2\text{H}_2\text{O}$ , 2-methoxyethanol and ethanolamine were purchased from Sigma-Aldrich. Zinc Oxide Sol-Gel stock solution was prepared by stirring 0.46 g  $\text{ZnAc}_2 \cdot 2\text{H}_2\text{O}$  in 5ml 2-methoxyethanol and 0.15 ml ethanol amine at 60 °C under ambient condition. Then the solution was cooled to room temperature and subsequently filtered from 0.45 $\mu\text{m}$  PTFE film before use. The PTB7-TH and small molecule acceptors were co-dissolved in chlorobenzene and chloronaphthalene (95:5 vol/vol). The overall material concentration was 15 mg  $\text{ml}^{-1}$  and the solution was stirred at 110 °C for 12 h under a  $\text{N}_2$  atmosphere. ITO glass substrate (Thin Film Devices) was cleaned in water, acetone and isopropylalcohol for 15 min under sonication. Glasses were then exposed to ultraviolet ozone irradiation for 30 min. A thin layer (~40 nm) of ZnO sol-gel was spin-coated at 4,000 rpm. for 40 sec onto ITO glasses and annealed at 200 °C in ambient condition for 30 min. After treated ZnO surface with 1 % ethanolamine solution in methoxyethanol (3000 rpm for 40 s), the substrates were dried in 90 °C oven then transferred into glovebox immediately. Active layers were spin-coated using the as-prepared solutions at 1,000 rpm in a glove box.  $\text{MoO}_3$  (7.5 nm) and Al (80 nm) anodes were thermal evaporated in a glove box at a chamber pressure of  $\sim 2.0 \times 10^{-6}$  torr.

## 3. Solar cell characterization.

$J$ - $V$  characteristics of the solar cells were measured under 1 sun, AM 1.5G irradiation (100  $\text{mWcm}^{-2}$ ) from a solar simulator with a xenon arc lamp (Oriel model 69920). Masks with a well-defined area of 3.14  $\text{mm}^2$  were used to determine the effective area of the  $J$ - $V$  measurement. Light intensity was calibrated using an NREL-certified monocrystalline silicon reference cell (Newport, 91150V) with a fused silica window. AFM images were obtained using an Asylum Cypher AFM. UV-vis spectra were taken using a UV-2401PC model UV-Vis spectrophotometer. The EQE measurement system was composed of a 250W Quartz Tungsten Halogen lamp as the light source, a filter wheel, a chopper, a monochromator, a lock-in amplifier and a calibrated silicon photodetector. GIWAXS measurements were performed at the 8ID-E beamline at the Advanced Source (APS), Argonne National Laboratory, using X-rays with awavelength of  $\lambda = 1.6868 \text{ \AA}$  and a beam size of 200  $\mu\text{m}$  (horizontal) and 20  $\mu\text{m}$  (vertical).

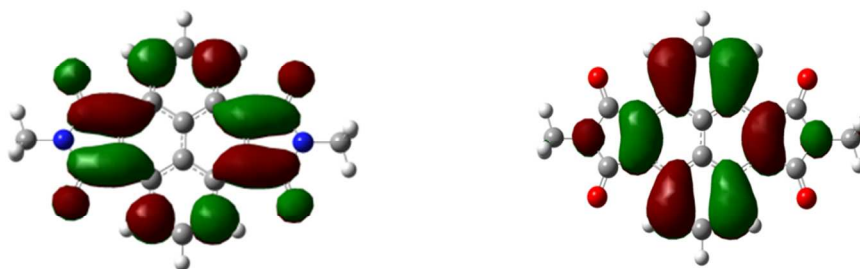

Figure S1. LUMO (left, -3.00eV) and HOMO (right, -6.05eV) orbitals of PID monomer which is simulated with Gaussian b3lyp/6-31gd.

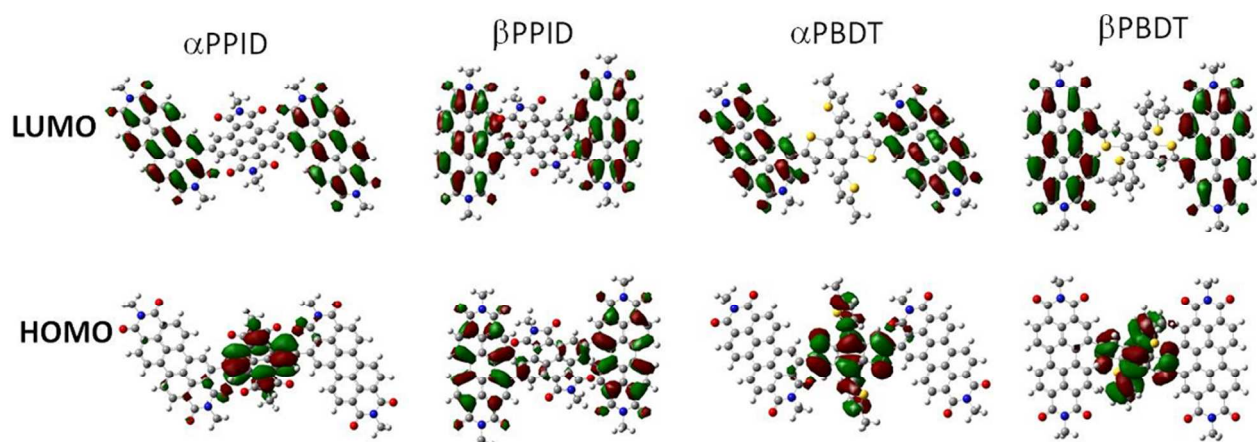

Figure S2. Calculated LUMO and HOMO of four compounds  $\alpha$ PPID,  $\beta$ PPID,  $\alpha$ PBDT and  $\beta$ PBDT.

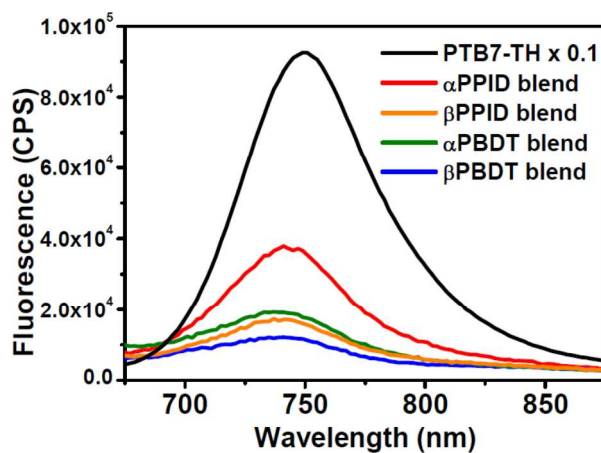

Figure S3. Film photoluminescence spectra of pure PTB7-TH, PTB7-TH: $\alpha$ PPID, PTB7-TH: $\beta$ PPID, PTB7-TH: $\alpha$ PBDT and PTB7-TH: $\beta$ PBDT (donor:acceptor=1:1.5) excited at 642 nm.

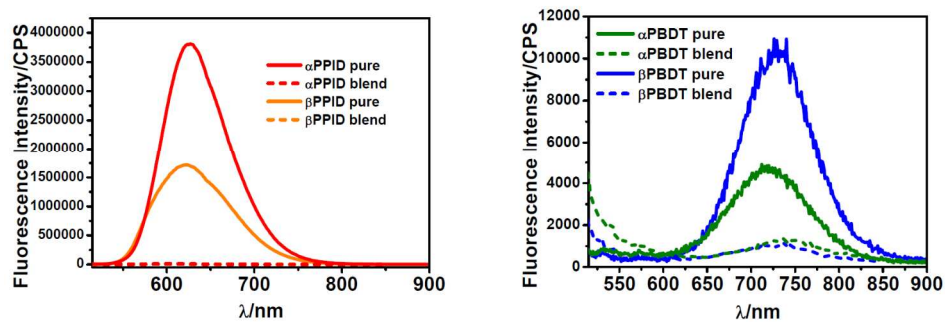

Figure S4. Film photoluminescence spectra of pure acceptors and blends (donor:acceptor=1:1.5). Left,  $\alpha$ PPID, PTB7-TH: $\alpha$ PPID,  $\beta$ PPID and PTB7-TH: $\beta$ PPID; right,  $\alpha$ PBDT, PTB7-TH: $\alpha$ PBDT,  $\beta$ PBDT and PTB7-TH: $\beta$ PBDT. Excited at 495 nm.

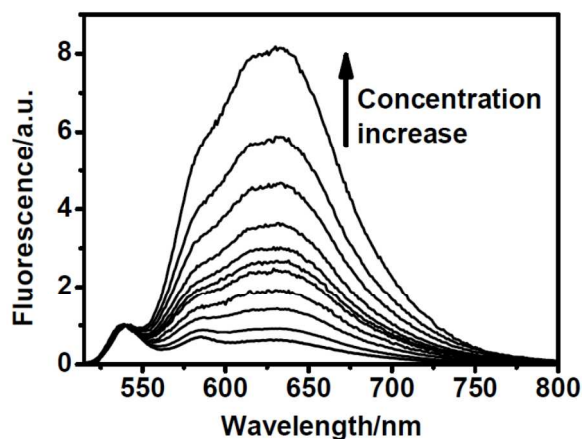

Figure S5. Concentration dependence fluorescence study of  $\alpha$ PPID dissolved in chlorobenzene. Spectra were normalized at 0-0 transition emission peak (535 nm). Concentration was gradually increased from  $2.1 \times 10^{-9}$  M to  $1.0 \times 10^{-6}$  M. (Concentration from low to high:  $2.1 \times 10^{-9}$  M,  $6.3 \times 10^{-9}$  M,  $1.9 \times 10^{-8}$  M,  $5.6 \times 10^{-8}$  M,  $1.1 \times 10^{-7}$  M,  $1.7 \times 10^{-7}$  M,  $2.5 \times 10^{-7}$  M,  $3.8 \times 10^{-7}$  M,  $5.7 \times 10^{-7}$  M,  $8.0 \times 10^{-7}$  M,  $1.0 \times 10^{-6}$  M.)

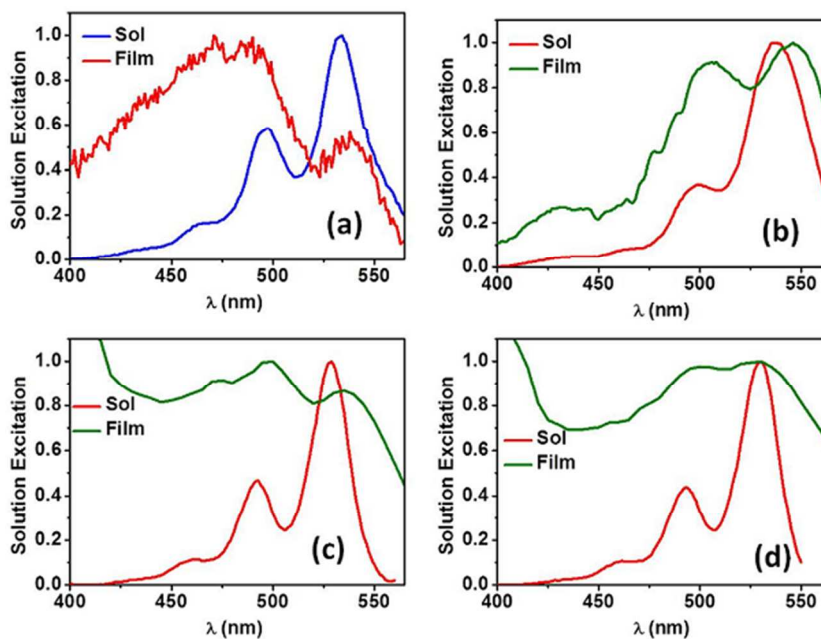

Figure S6. The solution and film excitation spectrum of (a),  $\alpha$ PPID; (b),  $\beta$ PPID; (c)  $\alpha$ PBDT; (d),  $\beta$ PBDT.

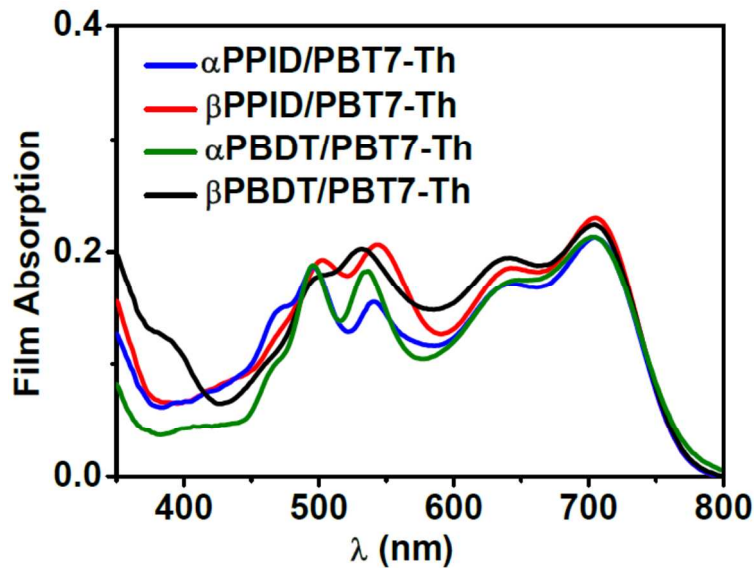

Figure S7. The film absorption spectrum of  $\alpha$ PPID/PBT7-Th;  $\beta$ PPID/PBT7-Th;  $\alpha$ PBDT/PBT7-Th;  $\beta$ PBDT/PBT7-Th.

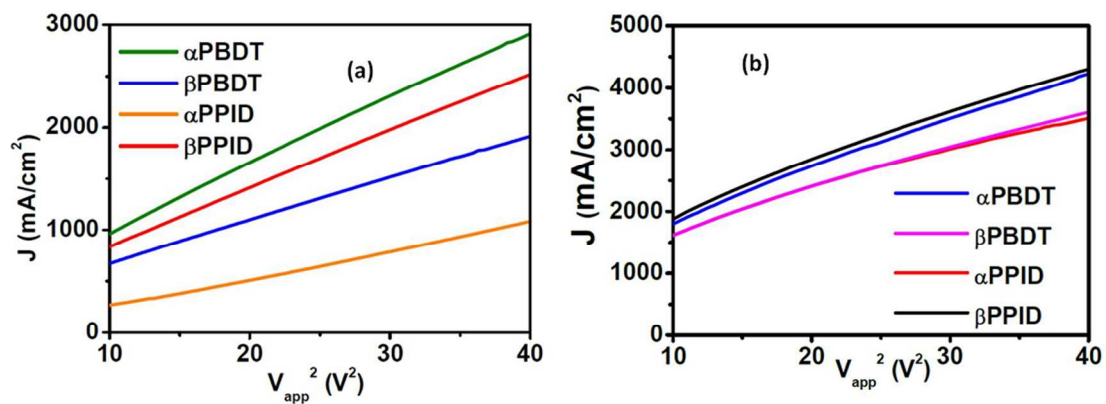

Figure S8. a) Electron mobility for the blend films of  $\alpha$ PPID,  $\beta$ PPID,  $\alpha$ PBDT,  $\beta$ PBDT /PTB7-TH; b) Hole mobility for the blend films of  $\alpha$ PPID,  $\beta$ PPID,  $\alpha$ PBDT,  $\beta$ PBDT /PTB7-TH.

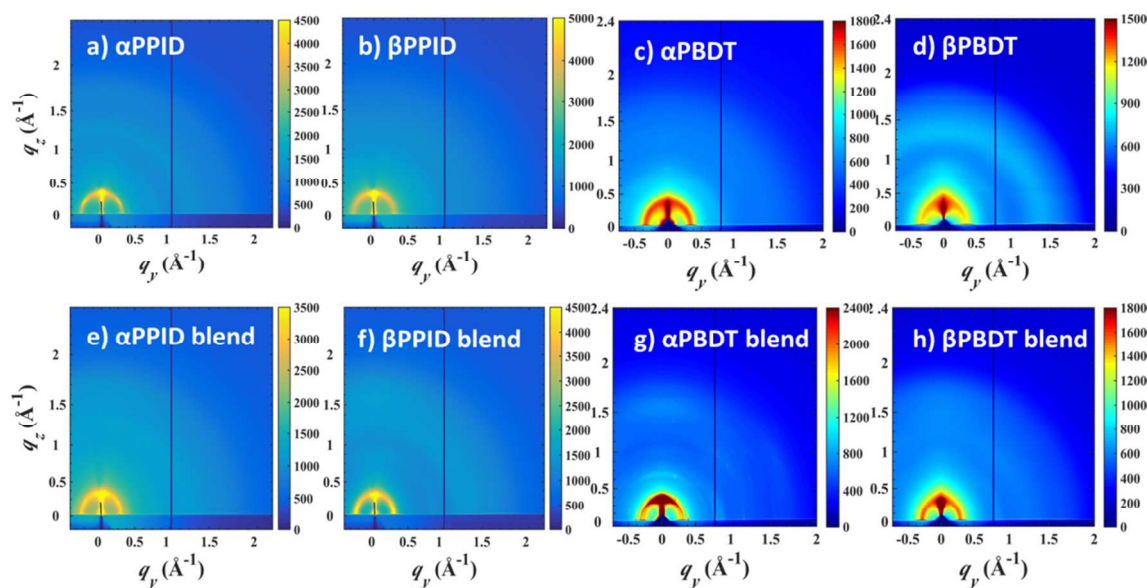

Figure S9. 2D GIWAXS patterns of films on PEDOT:PSS-modified Si substrates. a–h, 2D GIWAXS patterns of pristine  $\alpha$ PPID (a), pristine  $\beta$ PPID (b), pristine  $\alpha$ PBDT (c), pristine  $\beta$ PBDT (d), PTB7-TH:  $\alpha$ PPID (1:1.5) (e), PTB7-TH:  $\beta$ PPID (1:1.5) (f), PTB7-TH:  $\alpha$ PBDT (1:1.5) (g) and PTB7-TH:  $\beta$ PBDT (1:1.5) (h).

#### 4. References

- (1) Zhang, J.; Singh, S.; Hwang, D. K.; Barlow, S.; Kippelen, B.; Marder, S. R. 2-Bromo perylene diimide: synthesis using C–H activation and use in the synthesis of bis(perylenediimide)–donor electron-transport materials *J. Mater. Chem. C*. **2013**, *33*, 5093–5100.
- (2) Jiang, W.; Ye, L.; Li, X.; Xiao, C.; Tan, F.; Zhao, W.; Hou, J.; Wang, Z. Bay-linked perylene bisimides as promising non-fullerene acceptors for organic solar cells. *Chem. Commun.* **2014**, *50*, 1024–1026.
- (3) Minabe, M.; Nakada, K. Hydrogenation of pyrene and catalytic inter conversion of hydroxyrenes. *Bull. Chem. Soc. Jpn.* **1985**, *58*, 1962–1966.
